# Supplementary material
Source: Springer Nature journal article supplement (https://www.springermedizin.de/resource/supplementary/13002_2007_95_MOESM4_ESM.pdf/9627148)

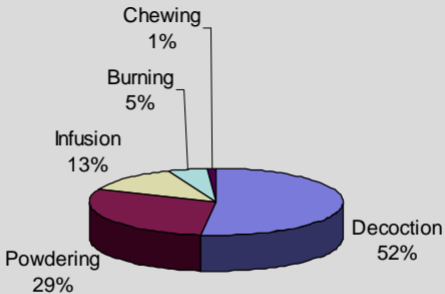

Supplement: MOESM4 [file 9627148]
